# Supplementary material for: A computational examination on the structure, spin-state energetics and spectroscopic parameters of high-valent FeIVNTs species
Source: Royal Society of Chemistry journal article supplement (doi:10.1039/c2dt31071f), 2012-01-01
Supplement: c2dt31071f.pdf [file c2dt31071f.pdf]

## *Supporting Information*

### **A Computational Examination on the Structure, Spin State Energetics and Spectroscopic Parameters of High-valent Fe<sup>IV</sup>=NTs Species**

Madhavan Jaccob and Gopalan Rajaraman\*

*Department of Chemistry, Indian Institute of Technology Bombay, Mumbai 400076, India.  
Email: rajaraman@chem.iitb.ac.in*

In order to find out the transition state for the formation of species  $[(N_4Py)Fe^{IV}=NTs]^{2+}$  from its precursor complex  $[Fe^{II}(N_4Py)(PhINTs)]^{2+}$ , the relaxed potential energy surface scan was performed with the variation of the N-I bond distances from the 3.74 Å to 4.54 Å. There is no distinct minima. So the formation of  $[(N_4Py)Fe^{IV}=NTs]^{2+}$  is likely to be a barrierless process.

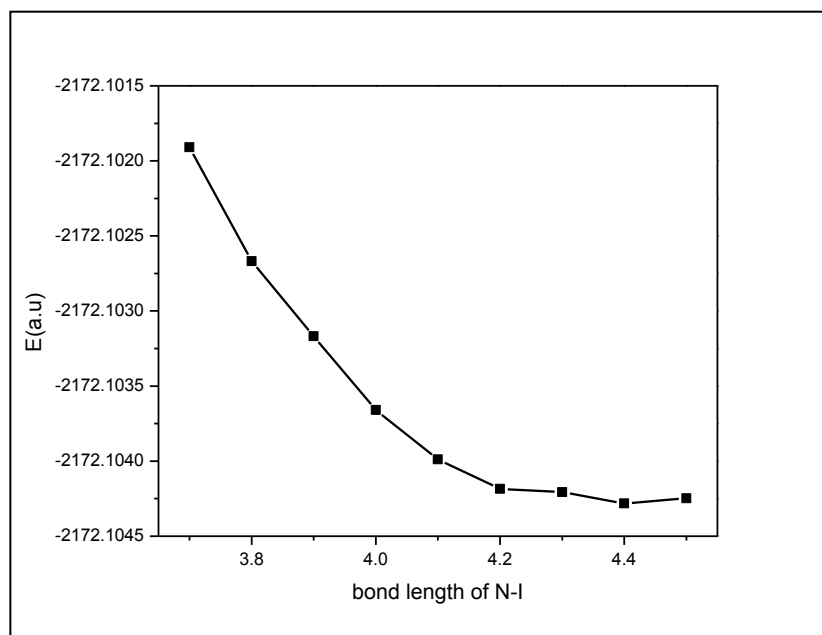

Figure S1. A relaxed scan of N-I bond distance performed for species **1**.

Table S1. B3LYP Optimized cartesian coordinates of species **1** in all the eight different spin state configurations

| ${}^7\mathbf{1}_{(\text{HS,T})}$ |              |              |              | ${}^3\mathbf{1}_{(\text{HS,T})}$ |              |              |              |
|----------------------------------|--------------|--------------|--------------|----------------------------------|--------------|--------------|--------------|
| 26                               | 0.103687000  | 0.291604000  | -0.000254000 | 26                               | -0.121542000 | 0.030713000  | 0.261255000  |
| 7                                | -0.365026000 | 2.206262000  | -0.001887000 | 7                                | -0.024749000 | -0.350090000 | 2.081165000  |
| 7                                | 0.704911000  | -1.885240000 | 0.001610000  | 7                                | -0.366387000 | 0.775904000  | -1.671257000 |
| 6                                | -0.667335000 | -2.490354000 | 0.002089000  | 6                                | 1.087931000  | 0.914233000  | -2.066170000 |
| 6                                | -1.414529000 | -1.978840000 | -1.224061000 | 6                                | 1.724978000  | -0.460415000 | -1.921136000 |
| 6                                | -2.225149000 | -2.775869000 | -2.022191000 | 6                                | 2.638798000  | -0.977452000 | -2.829535000 |
| 6                                | -2.931027000 | -2.174053000 | -3.070636000 | 6                                | 3.193682000  | -2.237536000 | -2.578654000 |
| 6                                | -2.802246000 | -0.802458000 | -3.277352000 | 6                                | 2.798249000  | -2.933256000 | -1.440083000 |
| 6                                | -1.963663000 | -0.068387000 | -2.438145000 | 6                                | 1.870157000  | -2.351677000 | -0.575354000 |
| 7                                | -1.281935000 | -0.649937000 | -1.435970000 | 7                                | 1.353103000  | -1.131397000 | -0.801832000 |
| 6                                | 1.482997000  | -2.164087000 | 1.240659000  | 6                                | -1.092207000 | 2.087572000  | -1.587644000 |
| 6                                | 2.180300000  | -0.935911000 | 1.794901000  | 6                                | -2.043345000 | 2.125525000  | -0.413157000 |
| 6                                | 3.278737000  | -1.049929000 | 2.645279000  | 6                                | -3.158877000 | 2.957622000  | -0.383161000 |
| 6                                | 3.824982000  | 0.103385000  | 3.209557000  | 6                                | -3.930681000 | 3.010936000  | 0.779961000  |
| 6                                | 3.262568000  | 1.343878000  | 2.902048000  | 6                                | -3.567128000 | 2.228082000  | 1.876427000  |
| 6                                | 2.179253000  | 1.383974000  | 2.033134000  | 6                                | -2.447351000 | 1.409067000  | 1.769648000  |
| 7                                | 1.648334000  | 0.267385000  | 1.493575000  | 7                                | -1.705129000 | 1.361018000  | 0.650558000  |
| 6                                | -1.414597000 | -1.976751000 | 1.227322000  | 6                                | 1.766560000  | 1.845044000  | -1.073128000 |
| 6                                | -2.225257000 | -2.772418000 | 2.026768000  | 6                                | 2.724590000  | 2.792454000  | -1.411137000 |
| 6                                | -2.931204000 | -2.168813000 | 3.074137000  | 6                                | 3.334704000  | 3.515598000  | -0.379427000 |
| 6                                | -2.802463000 | -0.796861000 | 3.278499000  | 6                                | 2.963216000  | 3.266863000  | 0.941058000  |
| 6                                | -1.963829000 | -0.064224000 | 2.438093000  | 6                                | 1.986077000  | 2.304930000  | 1.194710000  |
| 7                                | -1.282022000 | -0.647489000 | 1.436968000  | 7                                | 1.402320000  | 1.611909000  | 0.205397000  |
| 6                                | 1.483048000  | -2.166192000 | -1.236930000 | 6                                | -1.104153000 | -0.209612000 | -2.534982000 |
| 6                                | 2.180382000  | -0.938961000 | -1.793233000 | 6                                | -1.969505000 | -1.160961000 | -1.736093000 |
| 6                                | 3.278858000  | -1.054430000 | -2.643364000 | 6                                | -3.027146000 | -1.855581000 | -2.318243000 |
| 6                                | 3.825147000  | 0.097923000  | -3.209562000 | 6                                | -3.707074000 | -2.807693000 | -1.556268000 |
| 6                                | 3.262755000  | 1.338944000  | -2.904150000 | 6                                | -3.308958000 | -3.036661000 | -0.238109000 |
| 6                                | 2.179404000  | 1.380523000  | -2.035352000 | 6                                | -2.254685000 | -2.292081000 | 0.280465000  |
| 7                                | 1.648429000  | 0.264851000  | -1.493954000 | 7                                | -1.604416000 | -1.369821000 | -0.455306000 |
| 1                                | -0.634880000 | -3.586536000 | 0.003021000  | 1                                | 1.186544000  | 1.288253000  | -3.091380000 |
| 1                                | -2.308969000 | -3.841295000 | -1.831901000 | 1                                | 2.911617000  | -0.414391000 | -3.716553000 |
| 1                                | -3.573057000 | -2.772028000 | -3.710126000 | 1                                | 3.913542000  | -2.665528000 | -3.269489000 |
| 1                                | -3.342546000 | -0.297282000 | -4.070532000 | 1                                | 3.195122000  | -3.916487000 | -1.212040000 |
| 1                                | -1.854754000 | 1.004869000  | -2.542312000 | 1                                | 1.528911000  | -2.863932000 | 0.315807000  |
| 1                                | 0.794660000  | -2.535403000 | 2.006793000  | 1                                | -0.350027000 | 2.880958000  | -1.459255000 |
| 1                                | 2.210478000  | -2.964516000 | 1.065599000  | 1                                | -1.614715000 | 2.292584000  | -2.527467000 |
| 1                                | 3.695985000  | -2.027417000 | 2.867162000  | 1                                | -3.416853000 | 3.558908000  | -1.249442000 |
| 1                                | 4.678382000  | 0.034058000  | 3.877147000  | 1                                | -4.803631000 | 3.654842000  | 0.826237000  |
| 1                                | 3.657451000  | 2.263478000  | 3.319934000  | 1                                | -4.140170000 | 2.244734000  | 2.797084000  |
| 1                                | 1.712481000  | 2.320073000  | 1.745255000  | 1                                | -2.111592000 | 0.772265000  | 2.581510000  |
| 1                                | -2.309061000 | -3.838169000 | 1.838294000  | 1                                | 2.993674000  | 2.963966000  | -2.448629000 |
| 1                                | -3.573275000 | -2.765696000 | 3.714606000  | 1                                | 4.088991000  | 4.261896000  | -0.608978000 |
| 1                                | -3.342829000 | -0.290329000 | 4.070770000  | 1                                | 3.418214000  | 3.805120000  | 1.765360000  |
| 1                                | -1.854941000 | 1.009212000  | 2.540423000  | 1                                | 1.661895000  | 2.076025000  | 2.203670000  |
| 1                                | 0.794739000  | -2.538813000 | -2.002455000 | 1                                | -0.364610000 | -0.798872000 | -3.085817000 |
| 1                                | 2.210517000  | -2.966327000 | -1.060478000 | 1                                | -1.697946000 | 0.325235000  | -3.282655000 |
| 1                                | 3.696102000  | -2.032297000 | -2.863577000 | 1                                | -3.307925000 | -1.664367000 | -3.349480000 |
| 1                                | 4.678578000  | 0.027457000  | -3.876993000 | 1                                | -4.532947000 | -3.364309000 | -1.988477000 |
| 1                                | 3.657678000  | 2.257833000  | -3.323559000 | 1                                | -3.804888000 | -3.775748000 | 0.381648000  |
| 1                                | 1.712641000  | 2.317113000  | -1.749062000 | 1                                | -1.900737000 | -2.434169000 | 1.295527000  |
| 16                               | -1.699520000 | 3.152005000  | -0.002657000 | 16                               | 1.100023000  | -1.424156000 | 2.705494000  |
| 8                                | -2.385666000 | 2.874469000  | -1.278618000 | 8                                | 0.596071000  | -2.748547000 | 2.279428000  |
| 8                                | -2.385572000 | 2.876637000  | 1.273824000  | 8                                | 2.448722000  | -0.987616000 | 2.321841000  |
| 6                                | -1.142548000 | 4.855653000  | -0.004127000 | 6                                | 0.907736000  | -1.276784000 | 4.483766000  |
| 1                                | -0.557469000 | 5.036219000  | -0.907791000 | 1                                | -0.119495000 | -1.526877000 | 4.753682000  |
| 1                                | -2.040522000 | 5.480150000  | -0.004618000 | 1                                | 1.604547000  | -1.993910000 | 4.927510000  |
| 1                                | -0.557391000 | 5.037751000  | 0.899179000  | 1                                | 1.167260000  | -0.260905000 | 4.787341000  |

$^5\mathbf{1}_{(IS,T)}$

|    |              |              |              |
|----|--------------|--------------|--------------|
| 26 | -0.176502000 | 0.022108000  | 0.276964000  |
| 7  | 0.044106000  | -0.570983000 | 1.929512000  |
| 7  | -0.486047000 | 0.832052000  | -1.619659000 |
| 6  | 0.910293000  | 1.337895000  | -1.916938000 |
| 6  | 1.855052000  | 0.147689000  | -1.958435000 |
| 6  | 2.866226000  | -0.011795000 | -2.897224000 |
| 6  | 3.704826000  | -1.127153000 | -2.780280000 |
| 6  | 3.489545000  | -2.030937000 | -1.743007000 |
| 6  | 2.442563000  | -1.801242000 | -0.846632000 |
| 7  | 1.646629000  | -0.725570000 | -0.952812000 |
| 6  | -1.473598000 | 1.961864000  | -1.565476000 |
| 6  | -2.512617000 | 1.751013000  | -0.488511000 |
| 6  | -3.782167000 | 2.320484000  | -0.541108000 |
| 6  | -4.633933000 | 2.158508000  | 0.554214000  |
| 6  | -4.192971000 | 1.430264000  | 1.660777000  |
| 6  | -2.915451000 | 0.879201000  | 1.630640000  |
| 7  | -2.095546000 | 1.040797000  | 0.576990000  |
| 6  | 1.325878000  | 2.209760000  | -0.740293000 |
| 6  | 2.082743000  | 3.368116000  | -0.851197000 |
| 6  | 2.482322000  | 4.023122000  | 0.319611000  |
| 6  | 2.111203000  | 3.499223000  | 1.556901000  |
| 6  | 1.346688000  | 2.335422000  | 1.593422000  |
| 7  | 0.961738000  | 1.710329000  | 0.468258000  |
| 6  | -0.952226000 | -0.270951000 | -2.528256000 |
| 6  | -1.527492000 | -1.447861000 | -1.769257000 |
| 6  | -2.316011000 | -2.401900000 | -2.406430000 |
| 6  | -2.746831000 | -3.519198000 | -1.689089000 |
| 6  | -2.379002000 | -3.651169000 | -0.349621000 |
| 6  | -1.603199000 | -2.656053000 | 0.231895000  |
| 7  | -1.189930000 | -1.575857000 | -0.462189000 |
| 1  | 0.936512000  | 1.899203000  | -2.857491000 |
| 1  | 3.001330000  | 0.708196000  | -3.698483000 |
| 1  | 4.508436000  | -1.283191000 | -3.493364000 |
| 1  | 4.117458000  | -2.906721000 | -1.619511000 |
| 1  | 2.235347000  | -2.478352000 | -0.024870000 |
| 1  | -0.922645000 | 2.879787000  | -1.337420000 |
| 1  | -1.934374000 | 2.105316000  | -2.548408000 |
| 1  | -4.097460000 | 2.884407000  | -1.413604000 |
| 1  | -5.628185000 | 2.594415000  | 0.541409000  |
| 1  | -4.826241000 | 1.285691000  | 2.529397000  |
| 1  | -2.520085000 | 0.293437000  | 2.453924000  |
| 1  | 2.359641000  | 3.752495000  | -1.827657000 |
| 1  | 3.076183000  | 4.930035000  | 0.260440000  |
| 1  | 2.408514000  | 3.976284000  | 2.484234000  |
| 1  | 1.034097000  | 1.882034000  | 2.525478000  |
| 1  | -0.098868000 | -0.619541000 | -3.117478000 |
| 1  | -1.685762000 | 0.118050000  | -3.241082000 |
| 1  | -2.582486000 | -2.276774000 | -3.451412000 |
| 1  | -3.359103000 | -4.274893000 | -2.171537000 |
| 1  | -2.685491000 | -4.507951000 | 0.240313000  |
| 1  | -1.283465000 | -2.710151000 | 1.264177000  |
| 16 | 1.313195000  | -1.446870000 | 2.589109000  |
| 8  | 1.258182000  | -2.787936000 | 1.981154000  |
| 8  | 2.524269000  | -0.627745000 | 2.459663000  |
| 6  | 0.868057000  | -1.582858000 | 4.324206000  |
| 1  | -0.081660000 | -2.113114000 | 4.411804000  |
| 1  | 1.668572000  | -2.158427000 | 4.798129000  |
| 1  | 0.812012000  | -0.583731000 | 4.759502000  |

$^1\mathbf{1}_{(IS,T)}$

|    |              |              |              |
|----|--------------|--------------|--------------|
| 26 | -0.141154000 | 0.032363000  | 0.135249000  |
| 7  | 0.104627000  | -0.265251000 | 1.917873000  |
| 7  | -0.495513000 | 0.627583000  | -1.796906000 |
| 6  | 0.914178000  | 1.075173000  | -2.121796000 |
| 6  | 1.805271000  | -0.133256000 | -1.903825000 |
| 6  | 2.851634000  | -0.498474000 | -2.737548000 |
| 6  | 3.599965000  | -1.634932000 | -2.409180000 |
| 6  | 3.250593000  | -2.365853000 | -1.278232000 |
| 6  | 2.179023000  | -1.941479000 | -0.490594000 |
| 7  | 1.481241000  | -0.830839000 | -0.786223000 |
| 6  | -1.491402000 | 1.746066000  | -1.800636000 |
| 6  | -2.368267000 | 1.694618000  | -0.571437000 |
| 6  | -3.602754000 | 2.335499000  | -0.510895000 |
| 6  | -4.320723000 | 2.312146000  | 0.685532000  |
| 6  | -3.780795000 | 1.643709000  | 1.784542000  |
| 6  | -2.547826000 | 1.014101000  | 1.649686000  |
| 7  | -1.855873000 | 1.040973000  | 0.495139000  |
| 6  | 1.291933000  | 2.111288000  | -1.077562000 |
| 6  | 2.023417000  | 3.267134000  | -1.314068000 |
| 6  | 2.353356000  | 4.079975000  | -0.223619000 |
| 6  | 1.933019000  | 3.711689000  | 1.053537000  |
| 6  | 1.193068000  | 2.541236000  | 1.211438000  |
| 7  | 0.885575000  | 1.760400000  | 0.164537000  |
| 6  | -0.962984000 | -0.559503000 | -2.583918000 |
| 6  | -1.560295000 | -1.617107000 | -1.681248000 |
| 6  | -2.378994000 | -2.627551000 | -2.176998000 |
| 6  | -2.832935000 | -3.622164000 | -1.309758000 |
| 6  | -2.455057000 | -3.572869000 | 0.031576000  |
| 6  | -1.646846000 | -2.528151000 | 0.466553000  |
| 7  | -1.209156000 | -1.568708000 | -0.374253000 |
| 1  | 0.998872000  | 1.468029000  | -3.140619000 |
| 1  | 3.075287000  | 0.083200000  | -3.626206000 |
| 1  | 4.429478000  | -1.944625000 | -3.037227000 |
| 1  | 3.793467000  | -3.260555000 | -0.993725000 |
| 1  | 1.873400000  | -2.492171000 | 0.389982000  |
| 1  | -0.947419000 | 2.695840000  | -1.808883000 |
| 1  | -2.090162000 | 1.720761000  | -2.716281000 |
| 1  | -3.992668000 | 2.847648000  | -1.385147000 |
| 1  | -5.285076000 | 2.805758000  | 0.755403000  |
| 1  | -4.304359000 | 1.601630000  | 2.733467000  |
| 1  | -2.076656000 | 0.475599000  | 2.463070000  |
| 1  | 2.330972000  | 3.528949000  | -2.321424000 |
| 1  | 2.928260000  | 4.988321000  | -0.374651000 |
| 1  | 2.171912000  | 4.316370000  | 1.921504000  |
| 1  | 0.837209000  | 2.209124000  | 2.179131000  |
| 1  | -0.106789000 | -0.987154000 | -3.114546000 |
| 1  | -1.681100000 | -0.248465000 | -3.348645000 |
| 1  | -2.651197000 | -2.637996000 | -3.227953000 |
| 1  | -3.469841000 | -4.420612000 | -1.677578000 |
| 1  | -2.777492000 | -4.328703000 | 0.739293000  |
| 1  | -1.316113000 | -2.454845000 | 1.493947000  |
| 16 | 1.307531000  | -1.130307000 | 2.673251000  |
| 8  | 1.012905000  | -2.546003000 | 2.350216000  |
| 8  | 2.616251000  | -0.557554000 | 2.333786000  |
| 6  | 1.005531000  | -0.882747000 | 4.426120000  |
| 1  | 0.005660000  | -1.242928000 | 4.673124000  |
| 1  | 1.762669000  | -1.468626000 | 4.954613000  |
| 1  | 1.118991000  | 0.176986000  | 4.661639000  |

<sup>3</sup>1<sub>(LS,T)</sub>

|    |              |              |              |
|----|--------------|--------------|--------------|
| 26 | -0.131664000 | 0.040514000  | 0.129238000  |
| 7  | 0.152057000  | -0.447381000 | 1.798117000  |
| 7  | -0.476797000 | 0.755406000  | -1.763036000 |
| 6  | 0.952844000  | 1.111147000  | -2.107643000 |
| 6  | 1.749786000  | -0.169759000 | -1.961657000 |
| 6  | 2.751352000  | -0.590159000 | -2.823622000 |
| 6  | 3.412039000  | -1.791458000 | -2.541006000 |
| 6  | 3.025533000  | -2.527882000 | -1.424959000 |
| 6  | 2.001297000  | -2.048204000 | -0.607493000 |
| 7  | 1.390071000  | -0.877639000 | -0.862557000 |
| 6  | -1.382708000 | 1.946377000  | -1.693959000 |
| 6  | -2.252120000 | 1.883016000  | -0.461794000 |
| 6  | -3.434904000 | 2.607358000  | -0.338935000 |
| 6  | -4.140322000 | 2.553867000  | 0.863606000  |
| 6  | -3.641977000 | 1.770804000  | 1.905634000  |
| 6  | -2.460624000 | 1.064559000  | 1.709441000  |
| 7  | -1.778795000 | 1.121816000  | 0.549401000  |
| 6  | 1.438627000  | 2.058772000  | -1.022978000 |
| 6  | 2.248405000  | 3.167348000  | -1.228905000 |
| 6  | 2.681318000  | 3.890655000  | -0.111664000 |
| 6  | 2.284589000  | 3.480912000  | 1.159978000  |
| 6  | 1.462306000  | 2.362004000  | 1.285012000  |
| 7  | 1.051261000  | 1.667528000  | 0.213590000  |
| 6  | -1.062666000 | -0.354136000 | -2.584598000 |
| 6  | -1.727426000 | -1.400319000 | -1.713691000 |
| 6  | -2.637906000 | -2.315372000 | -2.235498000 |
| 6  | -3.139922000 | -3.320882000 | -1.408271000 |
| 6  | -2.713363000 | -3.381115000 | -0.081872000 |
| 6  | -1.814068000 | -2.425974000 | 0.379750000  |
| 7  | -1.336620000 | -1.450634000 | -0.418574000 |
| 1  | 1.047043000  | 1.545392000  | -3.108697000 |
| 1  | 3.008149000  | -0.000331000 | -3.697752000 |
| 1  | 4.205063000  | -2.145773000 | -3.192185000 |
| 1  | 3.503794000  | -3.468673000 | -1.175321000 |
| 1  | 1.669481000  | -2.600668000 | 0.263207000  |
| 1  | -0.767390000 | 2.850446000  | -1.648639000 |
| 1  | -1.984812000 | 2.022037000  | -2.604822000 |
| 1  | -3.794149000 | 3.206073000  | -1.170210000 |
| 1  | -5.063817000 | 3.111946000  | 0.982557000  |
| 1  | -4.158768000 | 1.700168000  | 2.856560000  |
| 1  | -2.027920000 | 0.435303000  | 2.477503000  |
| 1  | 2.537832000  | 3.460883000  | -2.232941000 |
| 1  | 3.318291000  | 4.760568000  | -0.237833000 |
| 1  | 2.605478000  | 4.013088000  | 2.048744000  |
| 1  | 1.124420000  | 2.001479000  | 2.248480000  |
| 1  | -0.257531000 | -0.828891000 | -3.153992000 |
| 1  | -1.767205000 | 0.048991000  | -3.318422000 |
| 1  | -2.941555000 | -2.246900000 | -3.275611000 |
| 1  | -3.848448000 | -4.046131000 | -1.796204000 |
| 1  | -3.067747000 | -4.153183000 | 0.592307000  |
| 1  | -1.443254000 | -2.437085000 | 1.396650000  |
| 16 | 1.278715000  | -1.343631000 | 2.642194000  |
| 8  | 0.990798000  | -2.757027000 | 2.334060000  |
| 8  | 2.603112000  | -0.782066000 | 2.348590000  |
| 6  | 0.876838000  | -1.046286000 | 4.366793000  |
| 1  | -0.141775000 | -1.385605000 | 4.562896000  |
| 1  | 1.588827000  | -1.636491000 | 4.951012000  |
| 1  | 0.998706000  | 0.015535000  | 4.587598000  |

<sup>5</sup>1<sub>(HS,S)</sub>

|    |              |              |              |
|----|--------------|--------------|--------------|
| 26 | -0.176004000 | 0.021388000  | 0.276554000  |
| 7  | 0.044046000  | -0.574629000 | 1.928181000  |
| 7  | -0.485205000 | 0.834822000  | -1.618486000 |
| 6  | 0.911343000  | 1.340709000  | -1.914827000 |
| 6  | 1.855777000  | 0.150310000  | -1.957902000 |
| 6  | 2.867574000  | -0.007730000 | -2.896273000 |
| 6  | 3.705964000  | -1.123360000 | -2.780611000 |
| 6  | 3.489887000  | -2.028874000 | -1.745004000 |
| 6  | 2.442328000  | -1.800580000 | -0.848963000 |
| 7  | 1.646604000  | -0.724586000 | -0.953869000 |
| 6  | -1.472436000 | 1.964858000  | -1.562631000 |
| 6  | -2.511321000 | 1.752985000  | -0.485725000 |
| 6  | -3.780564000 | 2.323253000  | -0.537200000 |
| 6  | -4.632159000 | 2.160164000  | 0.558091000  |
| 6  | -4.191355000 | 1.430059000  | 1.663492000  |
| 6  | -2.914157000 | 0.878313000  | 1.632239000  |
| 7  | -2.094421000 | 1.040981000  | 0.578626000  |
| 6  | 1.327041000  | 2.210546000  | -0.736708000 |
| 6  | 2.083959000  | 3.369055000  | -0.845582000 |
| 6  | 2.483587000  | 4.021977000  | 0.326377000  |
| 6  | 2.112488000  | 3.495877000  | 1.562738000  |
| 6  | 1.347931000  | 2.332030000  | 1.597209000  |
| 7  | 0.962929000  | 1.708941000  | 0.470953000  |
| 6  | -0.951720000 | -0.266575000 | -2.528918000 |
| 6  | -1.528919000 | -1.443729000 | -1.771801000 |
| 6  | -2.319057000 | -2.395488000 | -2.410339000 |
| 6  | -2.751261000 | -3.513412000 | -1.694776000 |
| 6  | -2.383185000 | -3.648240000 | -0.355672000 |
| 6  | -1.605790000 | -2.655219000 | 0.227326000  |
| 7  | -1.191159000 | -1.574451000 | -0.465011000 |
| 1  | 0.937868000  | 1.903463000  | -2.854507000 |
| 1  | 3.003290000  | 0.713584000  | -3.696234000 |
| 1  | 4.510077000  | -1.278267000 | -3.493375000 |
| 1  | 4.117621000  | -2.904934000 | -1.622579000 |
| 1  | 2.234380000  | -2.479138000 | -0.028605000 |
| 1  | -0.921155000 | 2.882327000  | -1.333531000 |
| 1  | -1.933370000 | 2.109661000  | -2.545287000 |
| 1  | -4.095753000 | 2.888630000  | -1.408791000 |
| 1  | -5.626163000 | 2.596665000  | 0.546153000  |
| 1  | -4.824507000 | 1.284590000  | 2.532049000  |
| 1  | -2.518917000 | 0.291109000  | 2.454556000  |
| 1  | 2.360867000  | 3.755133000  | -1.821370000 |
| 1  | 3.077458000  | 4.928986000  | 0.268797000  |
| 1  | 2.409819000  | 3.971265000  | 2.490925000  |
| 1  | 1.035351000  | 1.877038000  | 2.528489000  |
| 1  | -0.098109000 | -0.615436000 | -3.117594000 |
| 1  | -1.684042000 | 0.124098000  | -3.242077000 |
| 1  | -2.585684000 | -2.268194000 | -3.455020000 |
| 1  | -3.364802000 | -4.267367000 | -2.178332000 |
| 1  | -2.690717000 | -4.505596000 | 0.232883000  |
| 1  | -1.285855000 | -2.711514000 | 1.259424000  |
| 16 | 1.312033000  | -1.453202000 | 2.586317000  |
| 8  | 1.255531000  | -2.793206000 | 1.976140000  |
| 8  | 2.524101000  | -0.635274000 | 2.458324000  |
| 6  | 0.866573000  | -1.591570000 | 4.321137000  |
| 1  | -0.083973000 | -2.120565000 | 4.407725000  |
| 1  | 1.666181000  | -2.169151000 | 4.794169000  |
| 1  | 0.811924000  | -0.593083000 | 4.758137000  |

$^3\mathbf{1}_{(IS,S)}$

|    |              |              |              |
|----|--------------|--------------|--------------|
| 26 | -0.131650000 | 0.040632000  | 0.129303000  |
| 7  | 0.152080000  | -0.447725000 | 1.798041000  |
| 7  | -0.476515000 | 0.755996000  | -1.762861000 |
| 6  | 0.953179000  | 1.111510000  | -2.107365000 |
| 6  | 1.749861000  | -0.169616000 | -1.961607000 |
| 6  | 2.751367000  | -0.589982000 | -2.823666000 |
| 6  | 3.411768000  | -1.791514000 | -2.541375000 |
| 6  | 3.025028000  | -2.528161000 | -1.425548000 |
| 6  | 2.000890000  | -2.048463000 | -0.607974000 |
| 7  | 1.389944000  | -0.877682000 | -0.862719000 |
| 6  | -1.382212000 | 1.947119000  | -1.693423000 |
| 6  | -2.251843000 | 1.883422000  | -0.461444000 |
| 6  | -3.434750000 | 2.607549000  | -0.338626000 |
| 6  | -4.140324000 | 2.553778000  | 0.863818000  |
| 6  | -3.641989000 | 1.770661000  | 1.905801000  |
| 6  | -2.460519000 | 1.064589000  | 1.709650000  |
| 7  | -1.778549000 | 1.122101000  | 0.549709000  |
| 6  | 1.439126000  | 2.058837000  | -1.022509000 |
| 6  | 2.249176000  | 3.167267000  | -1.228186000 |
| 6  | 2.682165000  | 3.890264000  | -0.110784000 |
| 6  | 2.285230000  | 3.480416000  | 1.160766000  |
| 6  | 1.462684000  | 2.361674000  | 1.285546000  |
| 7  | 1.051591000  | 1.667481000  | 0.213950000  |
| 6  | -1.062649000 | -0.353210000 | -2.584692000 |
| 6  | -1.727558000 | -1.399529000 | -1.714056000 |
| 6  | -2.638108000 | -2.314365000 | -2.236113000 |
| 6  | -3.140324000 | -3.319969000 | -1.409126000 |
| 6  | -2.713893000 | -3.380512000 | -0.082701000 |
| 6  | -1.814509000 | -2.425578000 | 0.379182000  |
| 7  | -1.336869000 | -1.450144000 | -0.418914000 |
| 1  | 1.047493000  | 1.545921000  | -3.108334000 |
| 1  | 3.008276000  | 0.000049000  | -3.697625000 |
| 1  | 4.204731000  | -2.145838000 | -3.192621000 |
| 1  | 3.503028000  | -3.469147000 | -1.176149000 |
| 1  | 1.668926000  | -2.601120000 | 0.262547000  |
| 1  | -0.766698000 | 2.851029000  | -1.647611000 |
| 1  | -1.984136000 | 2.023316000  | -2.604365000 |
| 1  | -3.793964000 | 3.206345000  | -1.169857000 |
| 1  | -5.063916000 | 3.111706000  | 0.982721000  |
| 1  | -4.158860000 | 1.699845000  | 2.856671000  |
| 1  | -2.027831000 | 0.435289000  | 2.477685000  |
| 1  | 2.538736000  | 3.460941000  | -2.232142000 |
| 1  | 3.319364000  | 4.760042000  | -0.236756000 |
| 1  | 2.606154000  | 4.012404000  | 2.049632000  |
| 1  | 1.124605000  | 2.001070000  | 2.248917000  |
| 1  | -0.257653000 | -0.827941000 | -3.154297000 |
| 1  | -1.767185000 | 0.050274000  | -3.318324000 |
| 1  | -2.941650000 | -2.245655000 | -3.276243000 |
| 1  | -3.848906000 | -4.045053000 | -1.797268000 |
| 1  | -3.068421000 | -4.152665000 | 0.591304000  |
| 1  | -1.443745000 | -2.436951000 | 1.396092000  |
| 16 | 1.278385000  | -1.344529000 | 2.641988000  |
| 8  | 0.989973000  | -2.757731000 | 2.333396000  |
| 8  | 2.603082000  | -0.783449000 | 2.348792000  |
| 6  | 0.876463000  | -1.047531000 | 4.366643000  |
| 1  | -0.142233000 | -1.386668000 | 4.562604000  |
| 1  | 1.588291000  | -1.638056000 | 4.950728000  |
| 1  | 0.998573000  | 0.014192000  | 4.587765000  |

$^1\mathbf{1}_{(LS,S)}$

|    |              |              |              |
|----|--------------|--------------|--------------|
| 26 | -0.096114000 | -0.000006000 | 0.150815000  |
| 7  | -0.015400000 | -0.000115000 | 1.876693000  |
| 7  | -0.396668000 | 0.000038000  | -1.902633000 |
| 6  | 1.056334000  | -0.000003000 | -2.317212000 |
| 6  | 1.676503000  | -1.224580000 | -1.679084000 |
| 6  | 2.569364000  | -2.078360000 | -2.309988000 |
| 6  | 3.049589000  | -3.184433000 | -1.599991000 |
| 6  | 2.592881000  | -3.400711000 | -0.303178000 |
| 6  | 1.691559000  | -2.499470000 | 0.263964000  |
| 7  | 1.262303000  | -1.412930000 | -0.402141000 |
| 6  | -1.137241000 | 1.241267000  | -2.292480000 |
| 6  | -1.954940000 | 1.769613000  | -1.137424000 |
| 6  | -3.012380000 | 2.656712000  | -1.326935000 |
| 6  | -3.682218000 | 3.164119000  | -0.213984000 |
| 6  | -3.279341000 | 2.757797000  | 1.058566000  |
| 6  | -2.225597000 | 1.858909000  | 1.174010000  |
| 7  | -1.570910000 | 1.378615000  | 0.098303000  |
| 6  | 1.676593000  | 1.224508000  | -1.679045000 |
| 6  | 2.569507000  | 2.078241000  | -2.309936000 |
| 6  | 3.049835000  | 3.184251000  | -1.599912000 |
| 6  | 2.593172000  | 3.400514000  | -0.303081000 |
| 6  | 1.691783000  | 2.499330000  | 0.264048000  |
| 7  | 1.262427000  | 1.412844000  | -0.402087000 |
| 6  | -1.137323000 | -1.241123000 | -2.292535000 |
| 6  | -1.955082000 | -1.769443000 | -1.137512000 |
| 6  | -3.012602000 | -2.656437000 | -1.327073000 |
| 6  | -3.682516000 | -3.163811000 | -0.214154000 |
| 6  | -3.279635000 | -2.757556000 | 1.058417000  |
| 6  | -2.225806000 | -1.858774000 | 1.173909000  |
| 7  | -1.571039000 | -1.378520000 | 0.098234000  |
| 1  | 1.180736000  | 0.000010000  | -3.405524000 |
| 1  | 2.875766000  | -1.892137000 | -3.334365000 |
| 1  | 3.753864000  | -3.868957000 | -2.062464000 |
| 1  | 2.926141000  | -4.253079000 | 0.278614000  |
| 1  | 1.331278000  | -2.627864000 | 1.273229000  |
| 1  | -0.411841000 | 2.003323000  | -2.593418000 |
| 1  | -1.769491000 | 1.052046000  | -3.165682000 |
| 1  | -3.302252000 | 2.947386000  | -2.332003000 |
| 1  | -4.506670000 | 3.859078000  | -0.339543000 |
| 1  | -3.774746000 | 3.122590000  | 1.951829000  |
| 1  | -1.883426000 | 1.490373000  | 2.133332000  |
| 1  | 2.875874000  | 1.892028000  | -3.334326000 |
| 1  | 3.754157000  | 3.868734000  | -2.062375000 |
| 1  | 2.926515000  | 4.252831000  | 0.278739000  |
| 1  | 1.331545000  | 2.627702000  | 1.273332000  |
| 1  | -0.411973000 | -2.003223000 | -2.593485000 |
| 1  | -1.769543000 | -1.051828000 | -3.165742000 |
| 1  | -3.302480000 | -2.947050000 | -2.332157000 |
| 1  | -4.507034000 | -3.858685000 | -0.339752000 |
| 1  | -3.775104000 | -3.122318000 | 1.951657000  |
| 1  | -1.883632000 | -1.490281000 | 2.133247000  |
| 16 | 1.283459000  | 0.000019000  | 2.965199000  |
| 8  | 1.999171000  | -1.275460000 | 2.821247000  |
| 8  | 1.997373000  | 1.276665000  | 2.822618000  |
| 6  | 0.462367000  | -0.001397000 | 4.563474000  |
| 1  | -0.143297000 | -0.904330000 | 4.657301000  |
| 1  | 1.257576000  | -0.001262000 | 5.314214000  |
| 1  | -0.144520000 | 0.900612000  | 4.658259000  |

**Table S2.** Optimized geometrical parameters of eight different electronic spin states of species **1** obtained from B3LYP\* level (values in the parenthesis obtained from BP86 level). Bond lengths are given in Å and bond angles are given in degrees.

| $M_{\text{Fe,N}}$              | Fe-N1      | Fe-N2      | Fe-N3      | Fe-N3'     | Fe-N4      | Fe-N4'     | N2-Fe-N1     |
|--------------------------------|------------|------------|------------|------------|------------|------------|--------------|
| $^7\mathbf{1}_{\text{(HS,T)}}$ | 1.98(1.96) | 2.28(2.28) | 2.16(2.15) | 2.20(2.21) | 2.16(2.15) | 2.20(2.21) | 177.4(178.4) |
| $^3\mathbf{1}_{\text{(HS,T)}}$ | 1.85(1.74) | 2.10(2.06) | 2.18(1.97) | 2.16(2.01) | 2.12(1.99) | 2.22(1.99) | 169.9(175.9) |
| $^5\mathbf{1}_{\text{(IS,T)}}$ | 1.76(1.74) | 2.09(2.09) | 2.05(2.03) | 2.34(2.34) | 2.20(2.18) | 2.06(2.04) | 176.9(177.4) |
| $^1\mathbf{1}_{\text{(IS,T)}}$ | 1.80(1.73) | 2.07(2.07) | 2.00(1.98) | 2.07(2.01) | 2.03(2.01) | 2.03(1.99) | 172.6(173.4) |
| $^3\mathbf{1}_{\text{(LS,T)}}$ | 1.80(1.74) | 2.06(2.06) | 2.00(1.99) | 2.05(1.99) | 2.03(1.97) | 2.03(2.01) | 176.1(175.9) |
| $^5\mathbf{1}_{\text{(HS,S)}}$ | 1.76(1.74) | 2.10(2.09) | 2.05(2.18) | 2.34(2.04) | 2.20(2.03) | 2.20(2.34) | 176.7(177.4) |
| $^3\mathbf{1}_{\text{(IS,S)}}$ | 1.76(1.74) | 2.06(2.06) | 2.01(1.97) | 2.05(2.07) | 2.03(1.99) | 2.03(1.99) | 176.1(175.9) |
| $^1\mathbf{1}_{\text{(LS,S)}}$ | 1.73(1.72) | 2.08(2.07) | 2.00(2.02) | 2.06(1.99) | 2.05(1.97) | 2.05(2.01) | 172.2(166.9) |

**Table S3.** Calculated Mössbauer isomer shift and G, A and D tensor values of species **1** along with experimental data in the parenthesis.

|                                | $g_x, g_y, g_z$ *  | $A_x, A_y, A_z$ * | $\Delta E_q$ **<br>(mm/s) | $\eta$ ** | $\delta$ **<br>(mm/s) | $D(\text{cm}^{-1})$ * | $E/D$ * |
|--------------------------------|--------------------|-------------------|---------------------------|-----------|-----------------------|-----------------------|---------|
| $^7\mathbf{1}_{\text{(HS,T)}}$ | 2.008,2.012,2.012  | -22.9,-21.9,-17.9 | -0.15                     | 0.47      | -4.6                  | 7.07                  | 0.05    |
| $^5\mathbf{1}_{\text{(HS,S)}}$ | 2.008,2.011,2.023  | -24.2,-34.7,3.4   | 1.89                      | 0.66      | -4.8                  | 5.09                  | 0.02    |
| $^3\mathbf{1}_{\text{(IS,S)}}$ | 2.005, 2.009,2.015 | -9.6,-19.5,6.1    | -0.19                     | 0.43      | -4.5                  | 4.71                  | 0.09    |
| Exp                            | -                  | -20,-21,-3        | +0.98                     | -0.7      | 0.02                  | 29                    | 0.23    |

\* Computed using BP86 level; \*\* Computed using B3LYP level

**Table S4.** Solvent optimized geometrical parameters of eight different electronic spin states obtained from B3LYP level. Bond lengths are given in Å and bond angles are given in degrees.

| $M_{\text{Fe,N}}$              | Fe-N1 | Fe-N2 | Fe-N3 | Fe-N3' | Fe-N4 | Fe-N4' | N2-Fe-N1 | $\Delta E^a$ | S(Fe) | S(N)  |
|--------------------------------|-------|-------|-------|--------|-------|--------|----------|--------------|-------|-------|
| $^7\mathbf{1}_{\text{(HS,T)}}$ | 1.98  | 2.25  | 2.20  | 2.18   | 2.15  | 2.14   | 175.2    | 54.6         | 4.00  | 1.14  |
| $^3\mathbf{1}_{\text{(HS,T)}}$ | 1.87  | 2.07  | 2.09  | 2.22   | 2.17  | 2.06   | 170.9    | 55.7         | 2.86  | -0.89 |
| $^5\mathbf{1}_{\text{(IS,T)}}$ | 1.77  | 2.07  | 2.30  | 2.03   | 2.02  | 2.18   | 177.1    | 34.8         | 2.81  | 0.84  |
| $^1\mathbf{1}_{\text{(IS,T)}}$ | 1.82  | 2.05  | 2.06  | 2.01   | 1.99  | 2.02   | 172.1    | 25.5         | 0.93  | -0.74 |
| $^3\mathbf{1}_{\text{(LS,T)}}$ | 1.75  | 2.03  | 2.00  | 1.99   | 2.01  | 2.02   | 177.6    | 0            | 0.95  | 0.96  |
| $^5\mathbf{1}_{\text{(HS,S)}}$ | 1.77  | 2.07  | 2.30  | 2.03   | 2.02  | 2.18   | 177.1    | 34.9         | 2.81  | 0.84  |
| $^3\mathbf{1}_{\text{(IS,S)}}$ | 1.75  | 2.04  | 2.02  | 2.01   | 1.99  | 2.00   | 177.6    | 2.3          | 0.94  | 0.95  |
| $^1\mathbf{1}_{\text{(LS,S)}}$ | 1.71  | 2.06  | 2.01  | 2.03   | 2.02  | 1.99   | 173.9    | 52.9         | 0     | 0     |

From the above table, the geometrical parameters, Mulliken spin densities and relative energies, it is apparent that the solvation barely affects the conclusion drawn from gas phase energetics.
